# Supplementary material for: Synergistic Enhancement of Cancer Therapy Using a Combination of Ceramide and Docetaxel
Source: Int J Mol Sci. 2014 Mar 10;15(3):4201–20. doi: 10.3390/ijms15034201 (PMC3975392; doi:10.3390/ijms15034201)

## Supplementary Information

**Figure S1.** Cytoskeleton destruction effect of CE + DTX on B16 cells ( $n = 3$ ). The blue color indicated the location of nuclei, the green color indicated the location of F-actin and the red color represented the  $\beta$ -tubulin. The white arrows indicate the stress fibers of F-actin. Scale bar, 200  $\mu\text{m}$ .

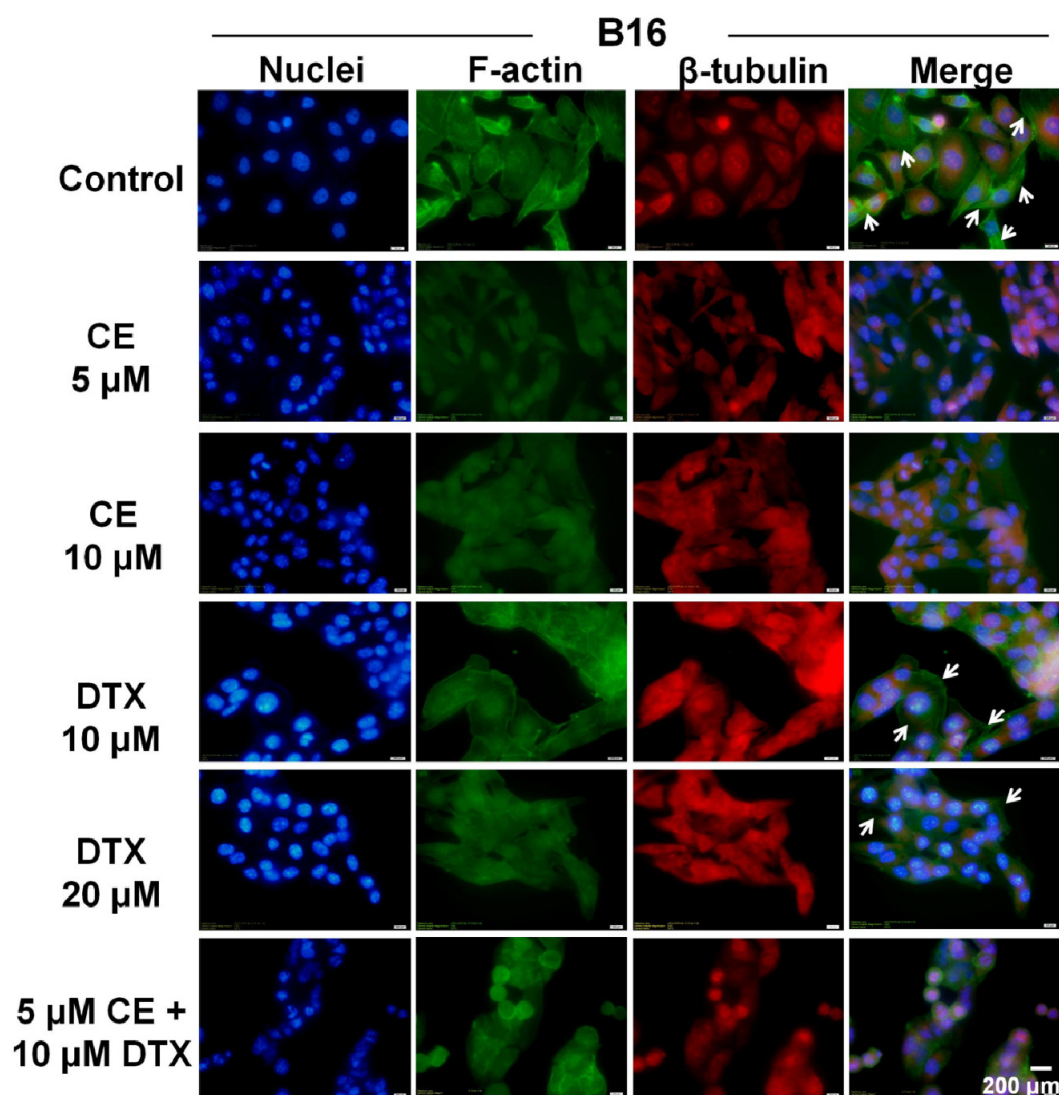

Supplement: Supplementary file 1 [file ijms-15-04201-s001.pdf]
